# Supplementary material for: The Unconventional Role of Acid Sphingomyelinase in Regulation of Retinal Microangiopathy in Diabetic Human and Animal Models
Source: PubMed Central journal article supplement — Diabetes. 2011 Aug 20;60(9):2370–8. doi: 10.2337/db10-0550 (PMC3161322; doi:10.2337/db10-0550), 2011-08-20

SUPPLEMENTARY DATA

**Supplementary Table 1. Diet fatty acid composition**

| <b>Fatty acid</b>  | <b>Control diet<br/>(percent of total)</b> | <b>DHA supplemented diet<br/>(percent of total)</b> |
|--------------------|--------------------------------------------|-----------------------------------------------------|
| 20:5n3             | 0.00                                       | 9.49                                                |
| 18:3n3             | 7.16                                       | 6.46                                                |
| 18:3n6             | 0.00                                       | 0.00                                                |
| 22:6n3             | 0.00                                       | 8.90                                                |
| 16:1n7             | 0.00                                       | 6.73                                                |
| 20:4n6             | 0.00                                       | 0.00                                                |
| 22:5n3             | 0.00                                       | 0.00                                                |
| 18:2n6             | 45.68                                      | 21.88                                               |
| 20:3n6             | 0.00                                       | 0.00                                                |
| 16:0               | 18.98                                      | 26.19                                               |
| 18:1n9             | 22.88                                      | 19.40                                               |
| 18:0               | 5.31                                       | 0.95                                                |
| <b>n6/n3 ratio</b> | <b>6.38</b>                                | <b>0.88</b>                                         |

SUPPLEMENTARY DATA

**Supplementary Table 2. RT-PCR primers**

| Gene name          | Sense sequence           | Anti-sense sequence      |
|--------------------|--------------------------|--------------------------|
| Rat ASM            | caactatgggctgaagaagga    | acagctgactggcacacatt     |
| Rat ICAM-1         | ccaccatcactgtgtattcggt   | acggagcagcactactgaga     |
| Rat VEGF A         | gctctcttgggtgcactgg      | caccacttcatgggctttct     |
| Rat IL-1 $\beta$   | caaggagagacaagcaacga     | gtttgggatccacactctcc     |
| Rat Cyclophilin    | cttcttctggtcttgcattct    | tggatggcaagcatgtggtctttg |
| Mouse ASM          | aacctggctaccgagttaccaa   | tggcctgggtcagattcaagatgt |
| Mouse ICAM-1       | acactatgtggactggcagtgggt | tgaggctcgattgttcagctgcta |
| Mouse VEGF A       | tcaccaaagccagcacataggaga | ttacacgtctcggatcttggaca  |
| Mouse IL-1 $\beta$ | aagggtgcttccaaaccttgac   | atactgctgcctgaagctcttgt  |
| Mouse VCAM-1       | cccaggtggaggtctactca     | ccagatgggtcaaggataca     |
| Mouse TNF $\alpha$ | tctcatgcaccaccatcaagg    | accactctcccttgcagaac     |
| Mouse Cyclophilin  | attcatgtgccaggggtgga     | ccgtttgtgggtccagca       |
| Human ASM          | caacctcgggctgaagaa       | tccaccatgtcatcctcaaaa    |
| Human IL-1 $\beta$ | ggcctcaaggaaaagaatc      | ttctgcttgagaggtgctga     |
| Human TNF $\alpha$ | tccttcagacacctcaacc      | aggccccagttgaattctt      |
| Human Cyclophilin  | caagactgagtgggtgatgg     | tggtgatcttctgctggtct     |

SUPPLEMENTARY DATA

**Supplementary Figure 1. ASM protein expression in caveolae and non-caveolae fractions isolated from control and DHA-treated HREC.** Caveolae fractions were isolated by sucrose discontinuous gradient ultracentrifugation based on their insolubility in Triton-X-100 at 4°C and identified by western blotting as fractions 3-4 based on the caveolin-1 (a marker for caveolae) distribution

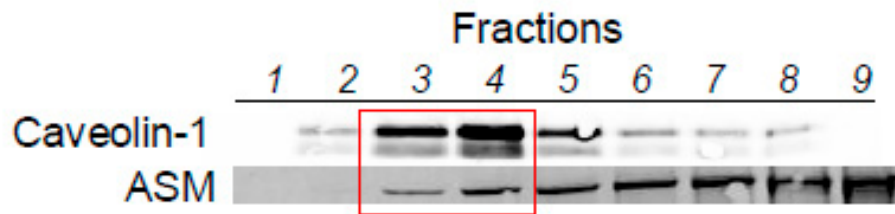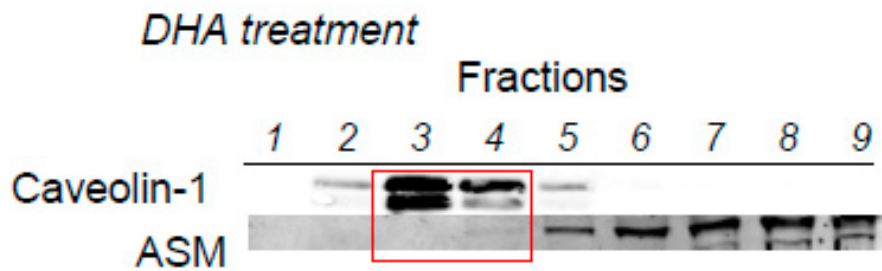

SUPPLEMENTARY DATA

**Supplementary Figure 2. Absolute values of Sphingomyelin (SM) and ceramide (Cer) species in caveolae and plasma membrane fractions.** Sphingomyelin and ceramide levels were determined by tandem mass spectrometry precursor ion mode scanning for the characteristic ceramide product ion at  $m/z$  264.4 and sphingomyelin species by positive ion mode PI  $m/z$  184 after alkaline hydrolysis of glycerophospholipids. The data is presented from HREC isolated from one representative donor.

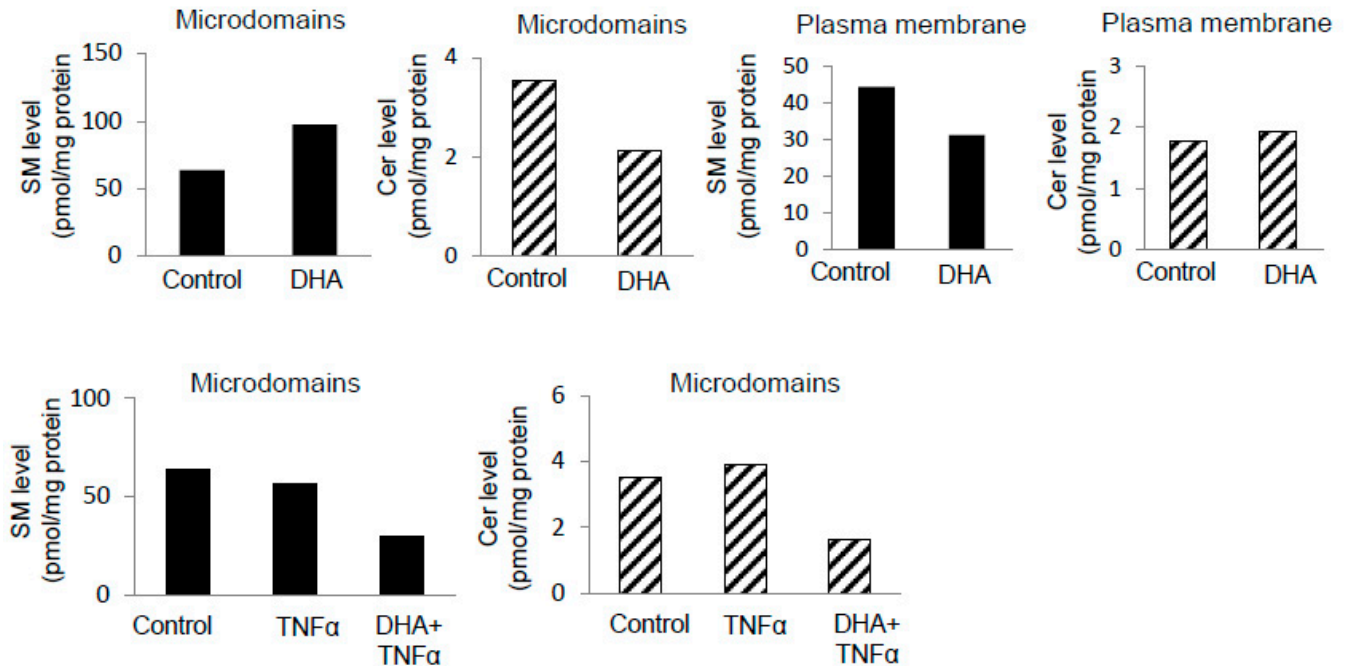

## SUPPLEMENTARY DATA

**Supplementary Figure 3. Retinal gene expression in ASM<sup>-/-</sup> and ASM<sup>+/+</sup> mice.** Extensive quantitative PCR analysis of retinas isolated from ASM<sup>+/+</sup> and ASM<sup>-/-</sup> for angiogenic and pro-inflammatory molecules. Ang1= Angiopoietin 1; Ang2 = Angiopoietin 2; Anp =Alanyl (membrane) aminopeptidase; Bai1= Brain-specific angiogenesis inhibitor 1; Ccl2= Chemokine (C-C motif) ligand 2; Cdh5= Cadherin 5; Col18= collagen type VIII, alpha 1; Col4= collagen type IV, alpha 3; Csf = Colony stimulating factor 3; Cxcl1 = Chemokine ligand 1; Cxcl2 = Chemokine ligand 2; Cxcl5 = Chemokine ligand 5; Tymp = Thymidine phosphorylase; S1pr1 = Sphingosine 1 phosphate receptor1; Efna1= Ephrin A1; Efnb2= Ephrin B2; Egf= Epidermal growth factor; Eng= Endoglin; Epas1= Endothelial PAS domain protein 1; Ephb4= Eph receptor B4; Ereg = Epiregulin; F2= Coagulation factor II; Fgf2= Fibroblast growth factor 1; Fgf6 = Fibroblast growth factor 6; Fgfr3= Fibroblast growth factor 3; Figf= C-fos induced growth factor; Flt1= FMS-like tyrosine kinase; Hand2= Heart and neural crest derivatives expressed transcript 2; Hgf= Hepatocyte growth factor; Ifgn= Interferon gamma; Igf1 = Insulin-like growth factor 1; IL-1b = Interleukin 1 beta; IL-6 = Interleukin 6; Itgav = Integrin alpha V; Itgb3= Integrin beta 3; Jag1 = Jagged 1; Kdr = Kinase insert domain protein receptor; Lama5= Laminin alpha 5; Lect1= Leukocyte cell derived chemotaxin 1; Lep = Leptin; Mapk14 = Mitogen-activated protein kinase 14; Mdk = Midkine; Mmp19 = Matrix metalloproteinase 19; Mmp2 = Matrix metalloproteinase 2; Mmp9 = Matrix metalloproteinase 9; Npr1 = Natriuretic peptide receptor 1; Nrp2 = Neuropilin 2; Pdgfa = Platelet derived growth factor alpha; Pecam1 = Platelet/endothelial cell adhesion molecule 1; Pgf= placental growth factor; Plau= Plasminogen activator urokinase; Plg= Plasminogen; Plxdc1= Plexin domain containing 1; Ptgs1= Prostaglandin-endoperoxide synthase 1; Serpin= Serine (or cysteine) peptidase inhibitor; Sphk1 = Sphingosine kinase 1; Stab = Stabilin 1; Tbx1= T-box 1; Tbx4= T-box 4; Tek = Endothelial specific receptor tyrosine kinase; Tgfa = Transforming growth factor alpha; Tgfb1= Transforming growth factor, beta 1; Tgfb2= Transforming growth factor, beta 2; Tgfb3= Transforming growth factor, beta 3; Tgfb1r= Transforming growth factor, beta receptor 1; Thbs1= Thrombospondin 1; Thbs2= Thrombospondin2; Timp2= Tissue inhibitor of metalloproteinase 2; Tsp6= Transmembrane serine protease 6; TNF = Tumor necrosis factor; Tnfai2 = Tumor necrosis factor alpha-induced protein 2; VegfA= Vascular endothelial growth factor A; VegfB= Vascular endothelial growth factor B; VegfC= Vascular endothelial growth factor C; Ccl11= Chemokine (C-C motif) ligand 11; Ctgf = Connective tissue growth factor; Gna13= Guanine nucleotide binding protein, alpha 13; Smad5= MAD homolog 5 (Drosophilla); TNFsf12 = Tumor necrosis factor (ligand) superfamily, member 12; Fgf1= Fibroblast growth factor 1; Fzd5= Frizzled homolog 5 (Drosophilla); Nrp1= Neuropilin 1; Hif1a =Hypoxia inducible factor 1, alpha subunit.

SUPPLEMENTARY DATA

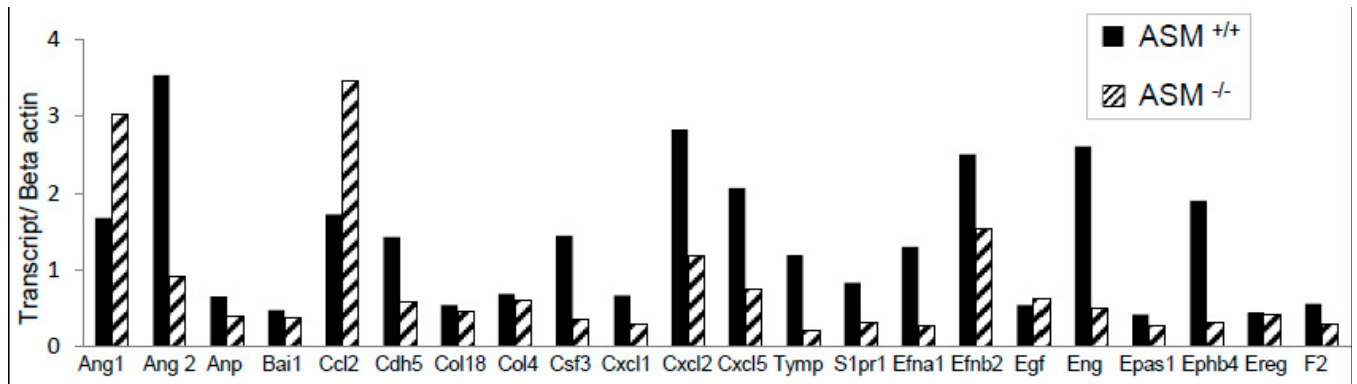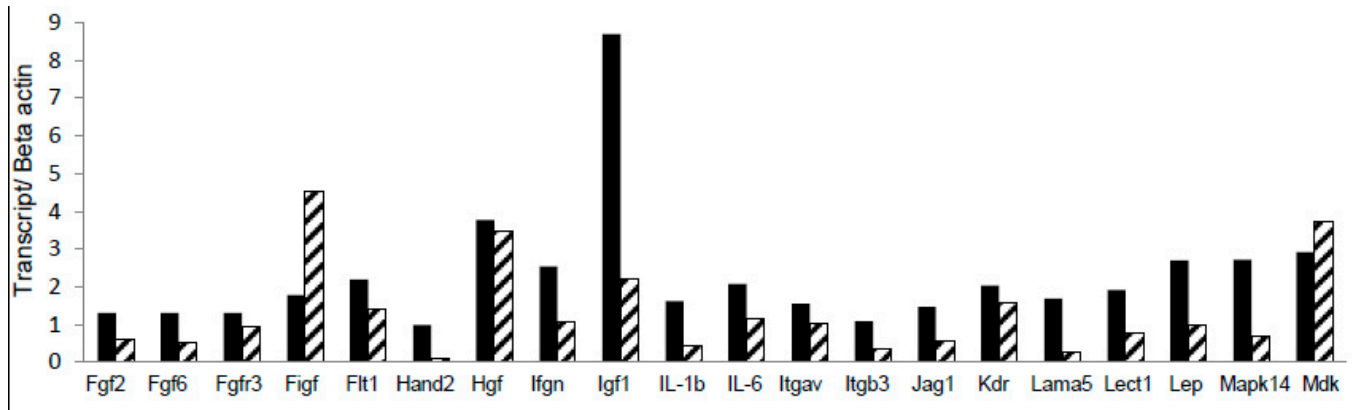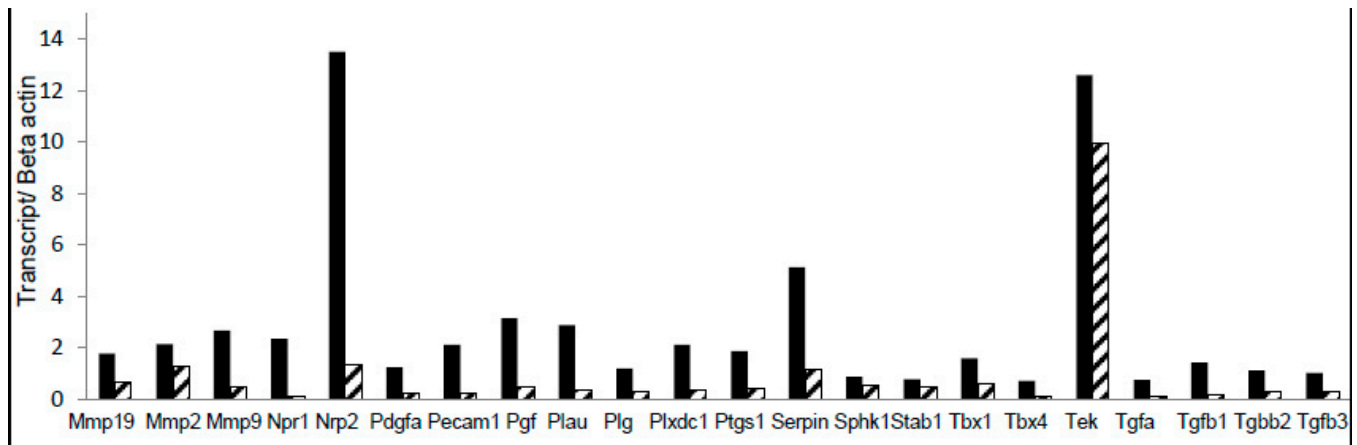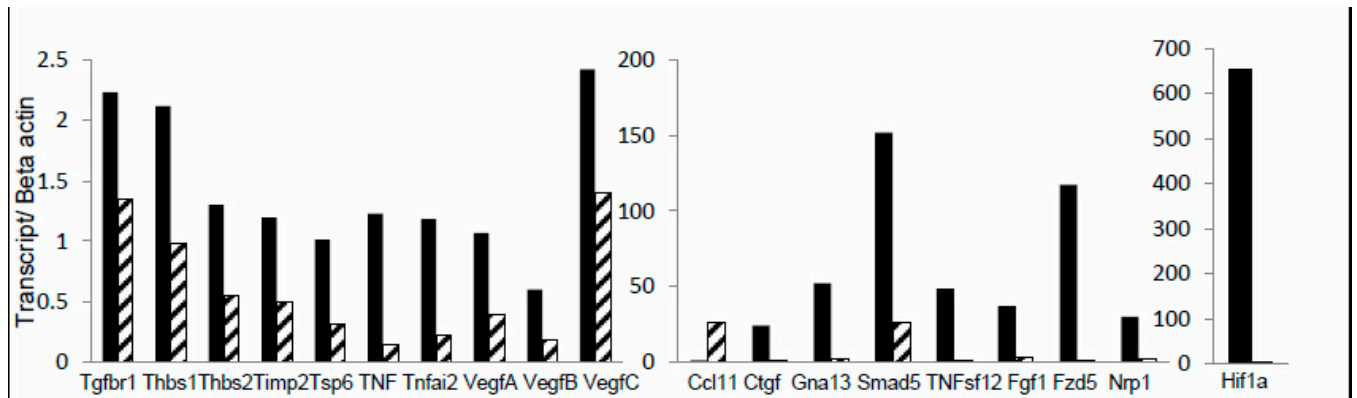

Supplement: supp_db10-0550_DB100550SupplementaryData.pdf [file supp_db10-0550_DB100550SupplementaryData.pdf]
